# Supplementary material for: GLP-1 receptor signalling promotes β-cell glucose metabolism via mTOR-dependent HIF-1α activation
Source: PubMed Central journal article supplement (PMC5454020; doi:10.1038/s41598-017-02838-2), 2017-06-01
Supplement: 41598_2017_2838_MOESM1_ESM.pdf [file 41598_2017_2838_MOESM1_ESM.pdf]

## GLP-1 receptor signalling promotes $\beta$ -cell glucose metabolism *via* mTOR-dependent HIF-1 $\alpha$ activation

Rodrigo Carlessi, Younan Chen, Jordan Rowlands, Vinicius F. Cruzat, Kevin N. Keane, Lauren Egan, Cyril Mamotte, Rebecca Stokes, Jenny E. Gunton, Paulo Ivo Homem de Bittencourt Jr. , Philip Newsholme

### Supplementary Information

**Supplementary Table 1.** List of genes assessed by qRT-PCR and respective RT<sup>2</sup> qPCR Primer Assay catalogue numbers.

| Gene Symbol | Refseq #  | Qiagen Catalogue Number |
|-------------|-----------|-------------------------|
| Pklr        | NM_012624 | PPR50315                |
| Pgam2       | NM_017328 | PPR44447                |
| Gpi         | NM_207592 | PPR52501                |
| Pfklp       | NM_206847 | PPR59714                |
| Aldoa       | NM_012495 | PPR42582                |
| Ldha        | NM_017025 | PPR56603                |
| Actb        | NM_031144 | PPR06570                |

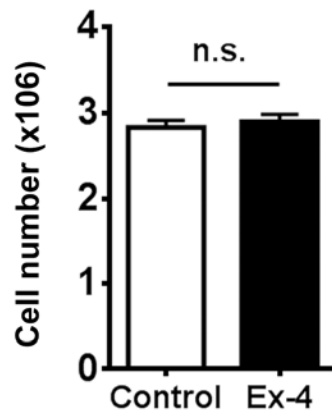

**S1. 18h of Ex-4 treatment does not induce BRIN-BD11 cell proliferation.** BRIN-BD11 cells were seeded in 6 well plates at a density of 10<sup>6</sup> cells per well and allowed to grow overnight. Cells were then treated in the presence or absence of 50 nM Exendin-4 for additional 18h in media containing 20 mM of glucose. At the end of incubation time cells were manually counted using a Neubauer chamber. Data are mean  $\pm$  SEM, n = 6; n.s. = non-significant.

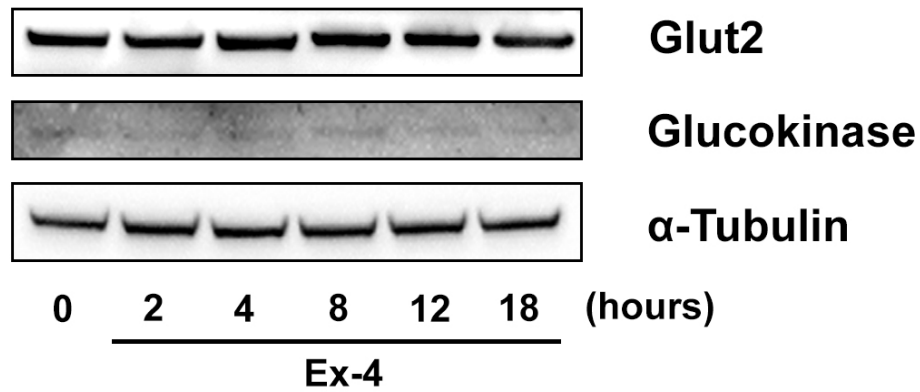

**S2. Protein levels of Glut2 and Glucokinase are unaffected by prolonged exposure to Exendin-4.** BRIN-BD11 cells were treated with 50 nM Exendin-4 for 2, 4, 8, 12 and 18 hours followed by immunoblot analysis of Glut2 and Glucokinase. Results are representative of at least three independent experiments.

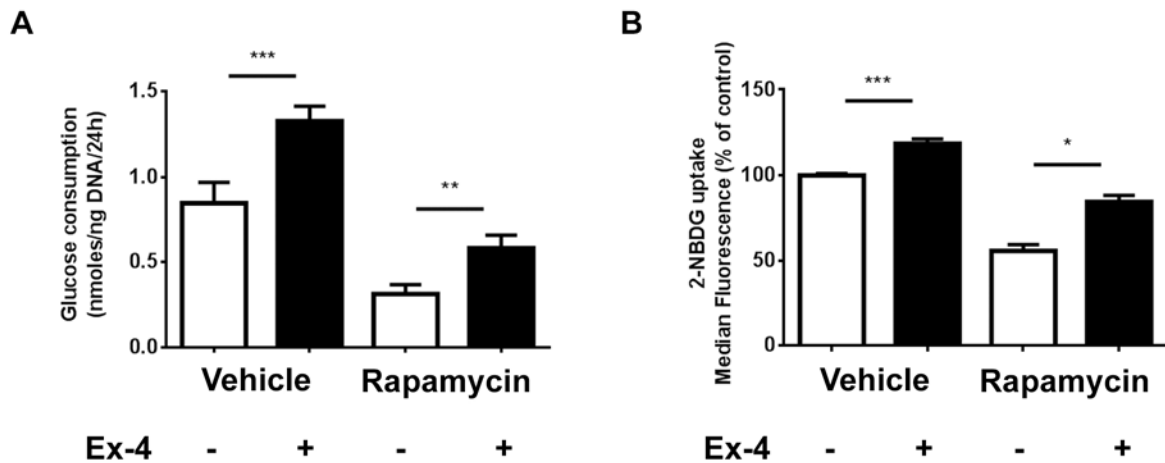

**S3. Exendin-4 conserves stimulatory activity in the presence of mTORC1 inhibitor, Rapamycin.** (A) BRIN-BD11 cells were pre-incubated with either vehicle or 100 nM Rapamycin for 30 min, followed by addition (or not) of 50 nM Exendin-4 for 18 hours, as indicated. Then, media was changed to RPMI containing 20 mM of glucose for additional 24 hours in the absence of Exendin-4 and glucose consumption was determined. (B) Cells were treated similarly to (A), but instead of the additional 24 hours incubation time, 2-NBDG

uptake was performed immediately following the 18 hours incubation period as described in Methods. Data represent mean  $\pm$  SEM, n = 3; \*P < 0.05; \*\*P < 0.01; \*\*\*P < 0.001.

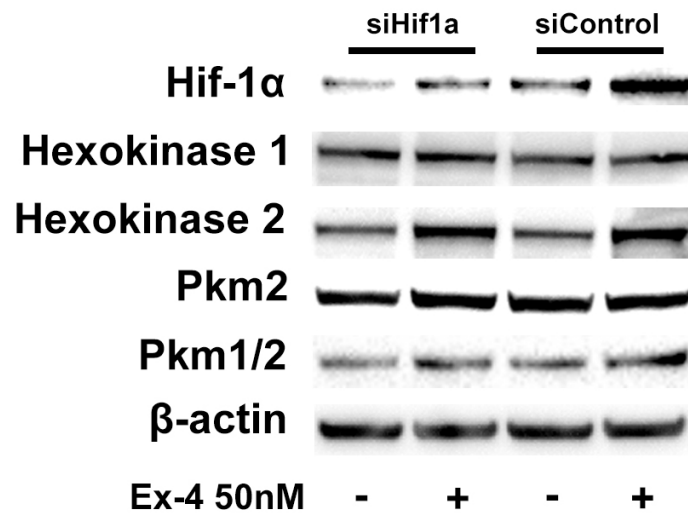

**S4. There is no evidence of an effect on protein levels of Hexokinase 1, Hexokinase 2, Pyruvate Kinase M 1 and M2 in response to HIF-1 $\alpha$  knockdown by siRNA transfection.**

BRIN-BD11 cells were transfected with either HIF-1 $\alpha$  specific siRNAs (*siHIF1a*) or non-targeting siRNAs (*siControl*) for 24h, and subsequently exposed to 50 nM Exendin-4 (or not) for 18h. Results are representative of at least three independent experiments.
